# Supplementary material for: Photoinduced ICT vs. excited rotamer intercoversion in two quadrupolar polyaromatic N-methylpyridinium cations
Source: Royal Society of Chemistry journal article supplement (doi:10.1039/c7cp06395d), 2018-01-01
Supplement: c7cp06395d1.pdf [file c7cp06395d1.pdf]

## Supporting Information

### Photoinduced ICT vs Excited Rotamer Intercoversion in two quadrupolar polyaromatic N-methylpyridinium cations.

A. Cesaretti, B. Carlotti, F. Elisei, C. G. Fortuna and A. Spalletti

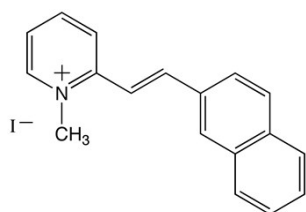

**[N1]**

1-methyl-2-[(E)-2-(2-naphthyl)vinyl]pyridinium

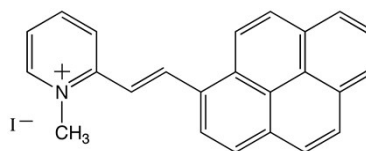

**[P1]**

1-methyl-2-[(E)-2-(1-pyrenyl)vinyl]pyridinium

**Chart S1.** Dipolar congeners of the investigated compounds.

#### Spectral, photophysical and photochemical properties

**Table S1.** Full Width at Half Maximum (FWHM) of the absorption and emission bands of **N1** and **N2** in solvents of different polarity and/or viscosity.

| Solvent          | FWHM /cm <sup>-1</sup> |      |          |      |
|------------------|------------------------|------|----------|------|
|                  | Absorption             |      | Emission |      |
|                  | N1*                    | N2   | N1*      | N2   |
| DCM              | 6100                   | 4500 | 3300     | 3200 |
| DCE              | 6000                   | 4300 | 3300     | 3200 |
| 2-PrOH           | 5500                   | 4500 | 3800     | 3400 |
| EtOH             | 5700                   | 4400 | 3700     | 3500 |
| MeOH             | 5700                   | 4600 | 3800     | 3600 |
| MeCN             | 5900                   | 4600 | 3600     | 3600 |
| MeOH/Gly (70/30) | -                      | 4300 | -        | 3600 |
| MeOH/Gly (50/50) | 5400                   | 4600 | 3800     | 3600 |
| EtGly            | 5800                   | 4500 | 3700     | 3700 |
| W/EtOH (70/30)   | 5800                   | 5100 | 3600     | 4000 |

\*From ref. 39.

**Table S2.** Full Width at Half Maximum (FWHM) of the absorption and emission bands of **P2** in solvents of different polarity and/or viscosity.

| Solvent          | FWHM /cm <sup>-1</sup> |          |
|------------------|------------------------|----------|
|                  | Absorption             | Emission |
| DCM              | 3900                   | 2800     |
| DCE              | 4100                   | 2900     |
| 2-PrOH           | 4300                   | 3000     |
| EtOH             | 4300                   | 3200     |
| MeOH/Gly (70/30) | 4400                   | 3300     |
| MeOH             | 4500                   | 3400     |
| Ac               | 4600                   | 3300     |

|       |      |      |
|-------|------|------|
| MeCN  | 4600 | 3500 |
| EtGly | 4600 | 3200 |

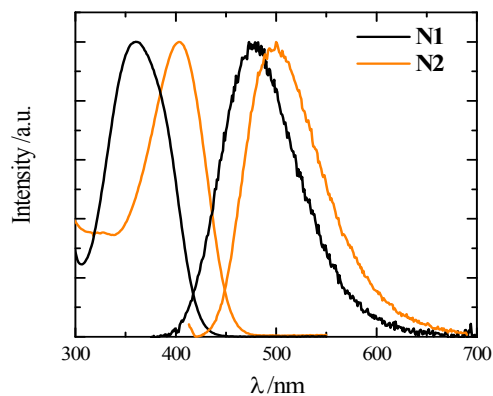

**Figure S1.** Normalized absorption and emission spectra of **N1** (black) and **N2** (orange) in 2-PrOH.

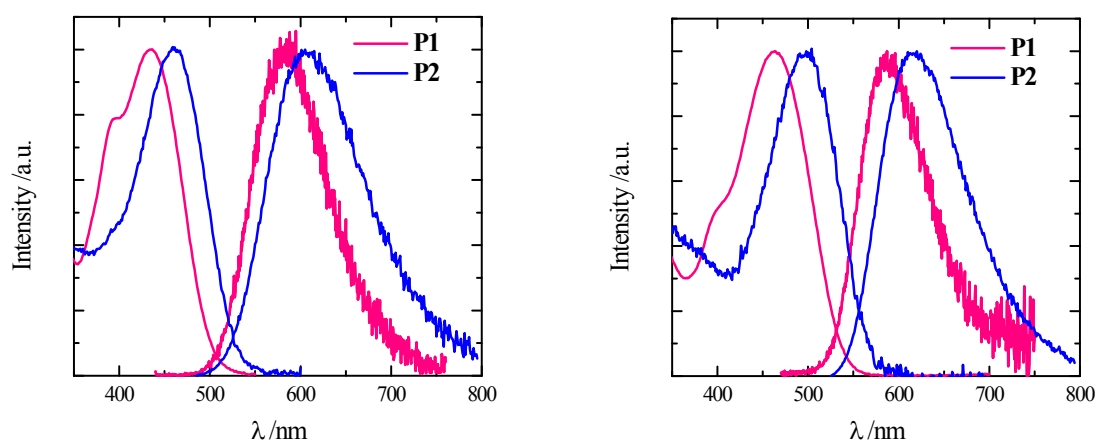

**Figure S2.** Normalized absorption and emission spectra of **P1** (pink) and **P2** (blue) in MeOH, left graph and DCM, right graph.

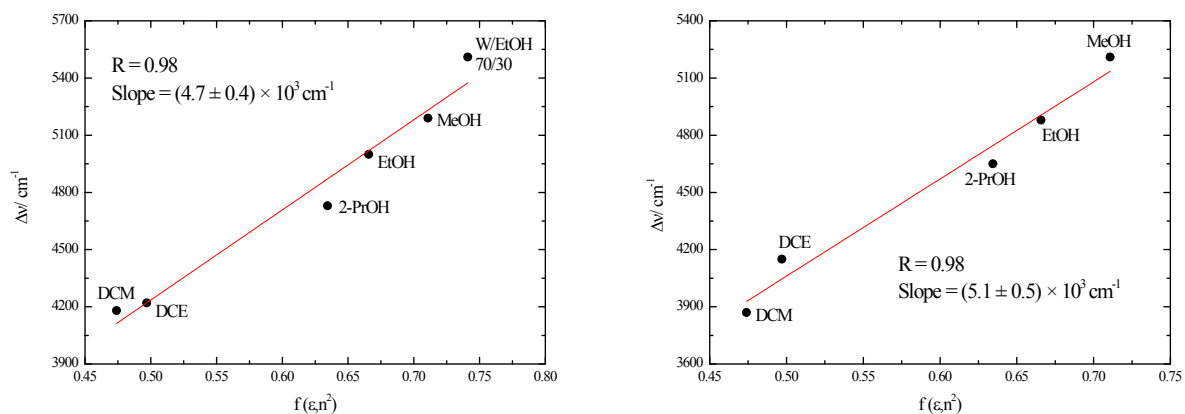

**Figure S3.** Quantification of the negative solvatochromism of **N2**, left graph, and **P2**, right graph, by the plot of the Stokes shift ( $\Delta\nu$ ) as a function of the polarity parameter  $f(\epsilon, n^2)$ , according to eq.1.

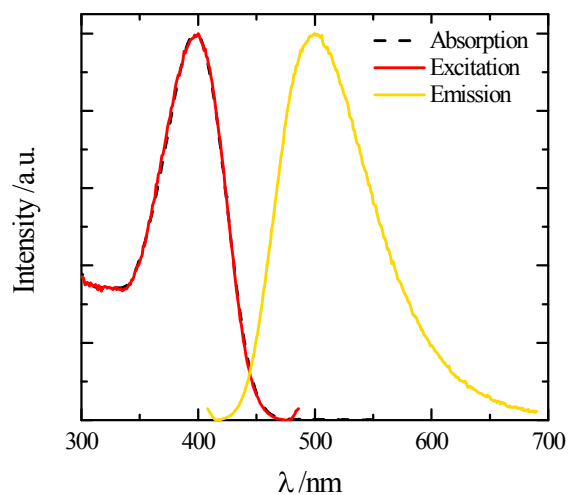

**Figure S4.** Absorption (black dashed line), excitation (red) and emission (yellow) spectra of **N2** in MeOH.

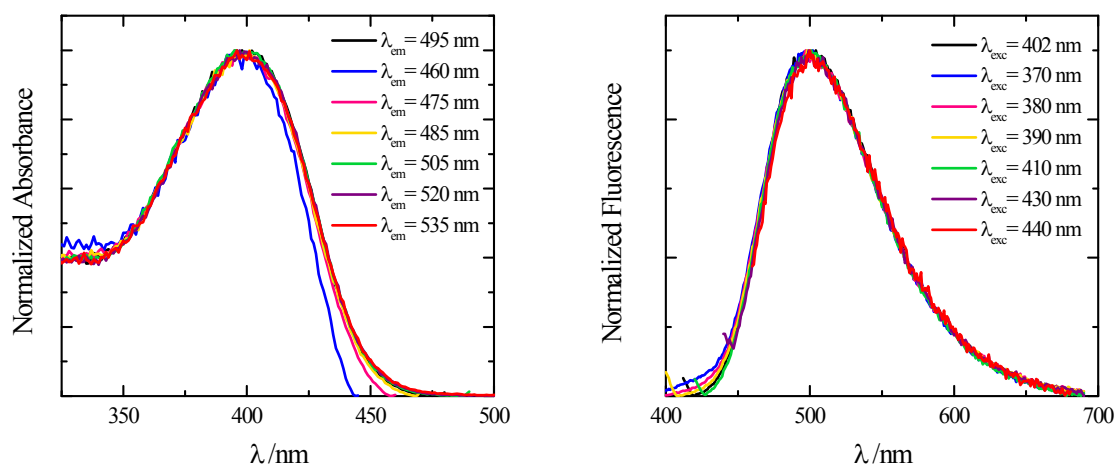

**Figure S5.** Emission wavelength effect on the excitation spectrum (left graph) and excitation wavelength effect on the emission spectrum (right graph) for **N2** in MeOH/Gly 50/50.

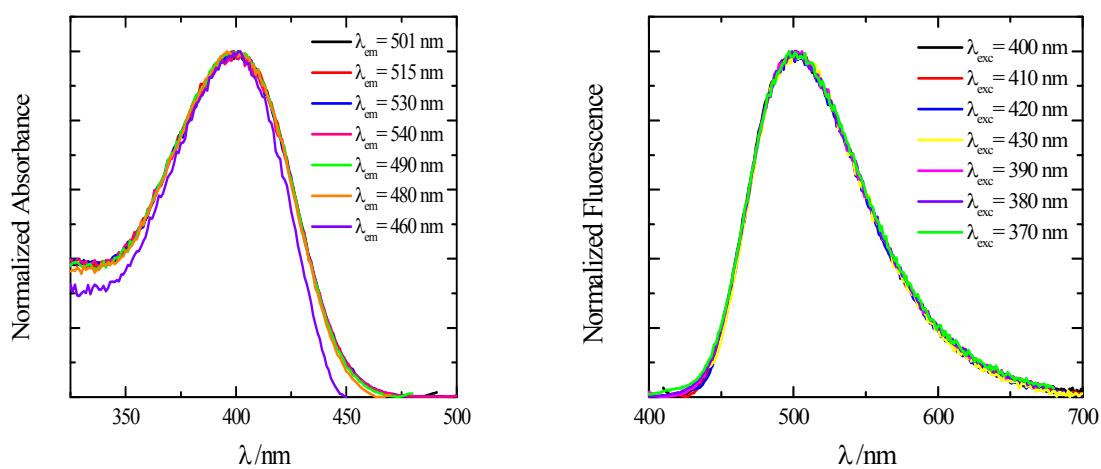

**Figure S6.** Emission wavelength effect on the excitation spectrum (left graph) and excitation wavelength effect on the emission spectrum (right graph) for **N2** in EtGly.

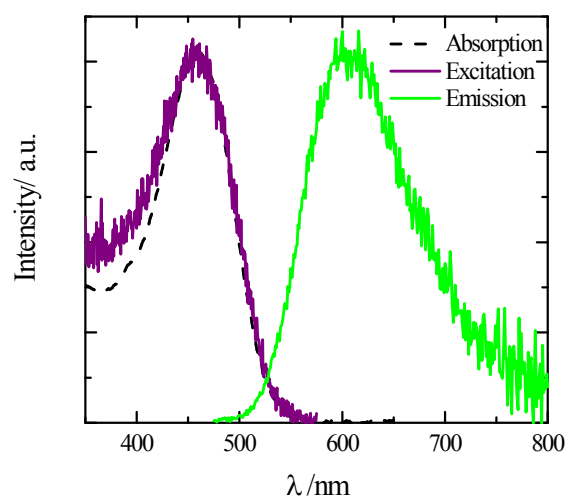

**Figure S7.** Absorption (black dashed line), excitation (purple) and emission (green) spectra of **P2** in MeOH.

Quantum-mechanical calculations

N2.

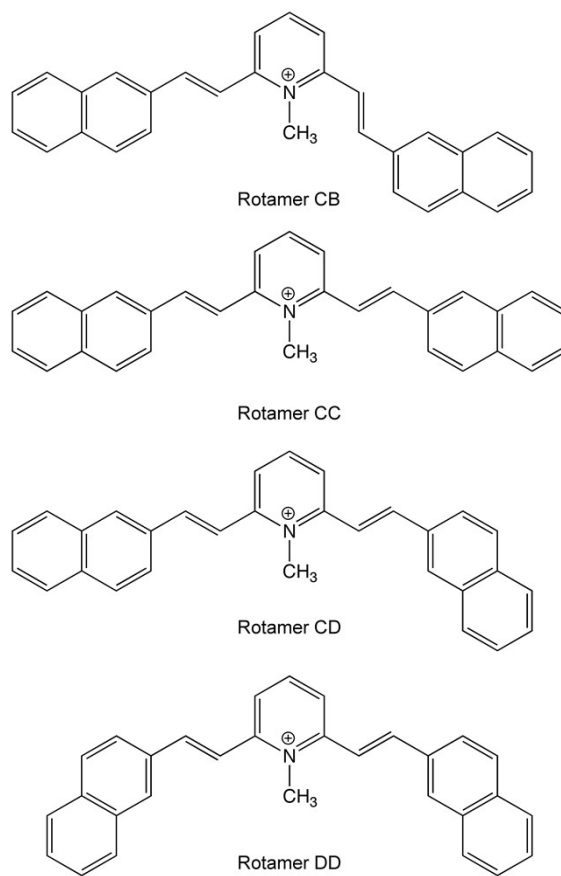

**Chart S2.** N2 conformers generated by rotation about the quasi-single bonds between the double bonds and the side naphthene rings or the central methyl-pyridinium unit.

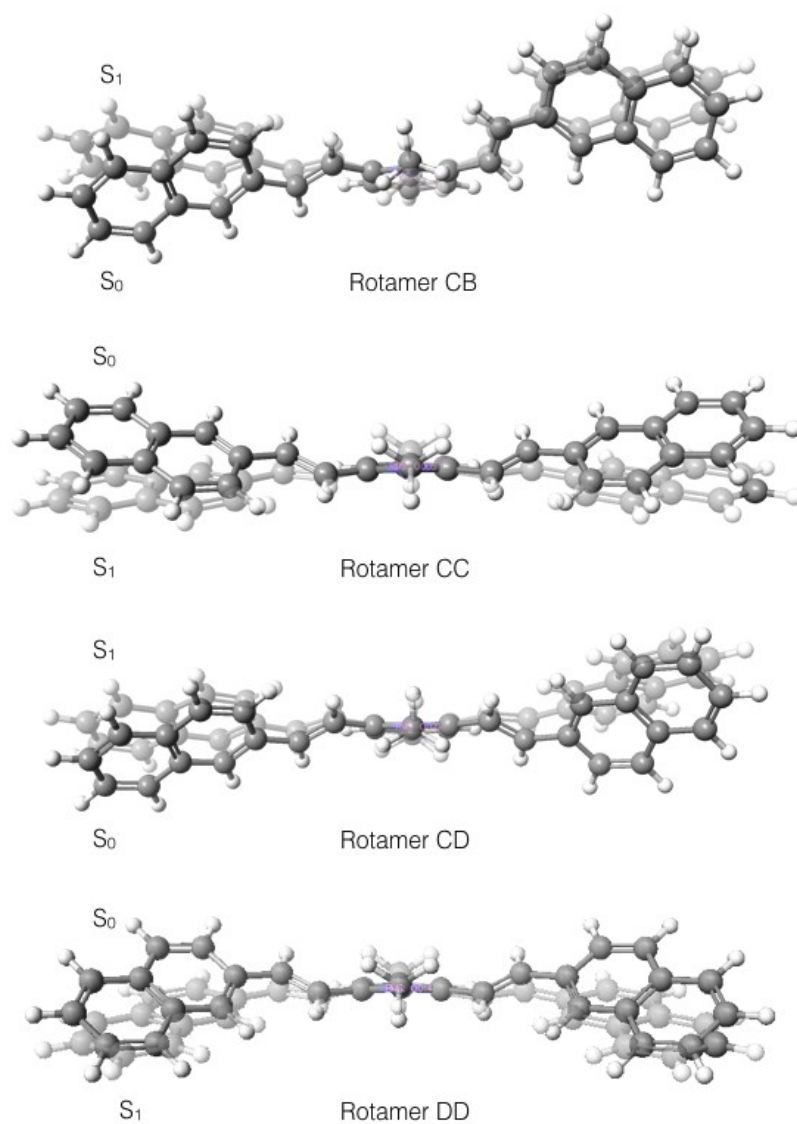

**Figure S8.** Molecular structures of ground and lowest excited singlet states (generally less planar and more planar, respectively) of **N2** rotamers obtained by the CAM-B3LYP/6-31G(d) model in DCM (CPCM).

**Table S3.** Dipole moments of **N2** rotamers together with the dihedral angles (Deg) obtained by the CAM-B3LYP/6-31G(d) model in DCM (CPCM).

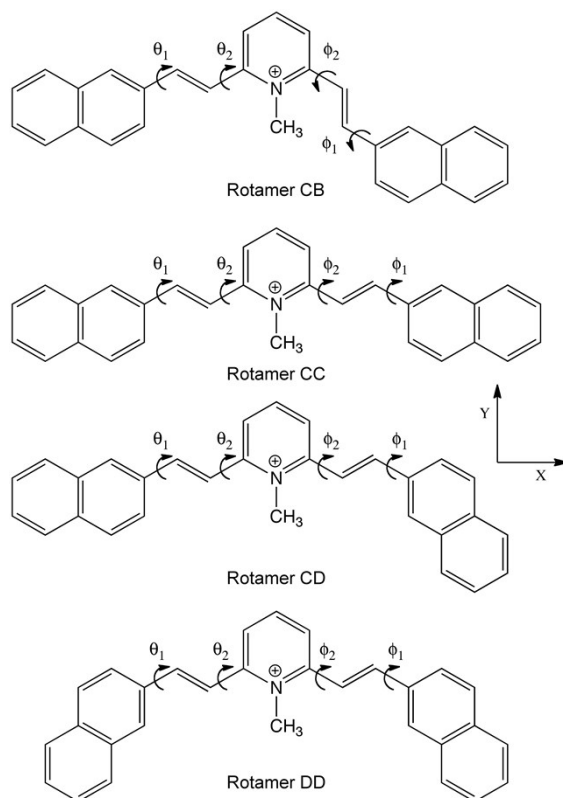

| rotamer   | state           | $ \mu_x $ | $ \mu_y $ | $ \mu_z $ | $ \mu_r $ | $\theta_1$ | $\theta_2$ | $\phi_1$ | $\phi_2$ |
|-----------|-----------------|-----------|-----------|-----------|-----------|------------|------------|----------|----------|
| <b>CB</b> | $S_0$           | 0.06      | 4.86      | 0.70      | 4.91      | 4.1        | 33.7       | 13.4     | 41.0     |
|           | $S_{1,FC}$      | 0.51      | 1.82      | 0.02      | 1.89      |            |            |          |          |
|           | $S_{1,rel}$     | 2.03      | 2.59      | 0.55      | 3.33      | 1.52       | 15.4       | 6.0      | 17.5     |
|           | $S_0@S_{1,rel}$ | 0.22      | 4.66      | 0.79      | 4.73      |            |            |          |          |
| <b>CC</b> | $S_0$           | 0.00      | 3.00      | 1.60      | 3.40      | 2.7        | 34.6       | 2.7      | 34.6     |
|           | $S_{1,FC}$      | 0.00      | 0.93      | 0.54      | 1.08      |            |            |          |          |
|           | $S_{1,rel}$     | 0.00      | 1.68      | 0.41      | 1.73      | 1.5        | 16.3       | 1.5      | 16.3     |
|           | $S_0@S_{1,rel}$ | 0.00      | 3.02      | 0.72      | 3.10      |            |            |          |          |
| <b>CD</b> | $S_0$           | 0.08      | 3.79      | 1.30      | 4.00      | 2.6        | 34.6       | 12.7     | 34.8     |
|           | $S_{1,FC}$      | 0.59      | 1.07      | 0.51      | 1.33      |            |            |          |          |
|           | $S_{1,rel}$     | 4.68      | 1.65      | 0.30      | 4.97      | 1.2        | 25.4       | 2.1      | 11.1     |
|           | $S_0@S_{1,rel}$ | 1.99      | 3.72      | 0.45      | 4.25      |            |            |          |          |
| <b>DD</b> | $S_0$           | 0.00      | 4.68      | 1.10      | 4.80      | 11.3       | 34.2       | 11.5     | 34.3     |
|           | $S_{1,FC}$      | 0.02      | 1.29      | 0.49      | 1.38      |            |            |          |          |
|           | $S_{1,rel}$     | 0.05      | 2.18      | 0.31      | 2.21      | 2.4        | 17.2       | 2.4      | 17.3     |
|           | $S_0@S_{1,rel}$ | 0.02      | 4.69      | 0.58      | 4.73      |            |            |          |          |

**Table S4.** Theoretical absorption and emission wavelengths of **N2** (rotamer CC), oscillator strengths, nature and composition in terms of molecular orbitals obtained by the CAM-B3LYP/6-31G(d) model in DCM (CPCM), together with the experimental absorption and emission maxima.

| Transition               | $\lambda_{\text{th}}/\text{nm}$ | f      | MO                                  | $c_i^2/\%$ | $\lambda_{\text{exp}}/\text{nm}$ |
|--------------------------|---------------------------------|--------|-------------------------------------|------------|----------------------------------|
| $S_0 \rightarrow S_1$    | 380                             | 2.2545 | $\pi_H \rightarrow \pi_L^*$         | 73         | 417                              |
| $S_0 \rightarrow S_2$    | 331                             | 0.1252 | $\pi_{H-1} \rightarrow \pi_L^*$     | 54         |                                  |
| $S_0 \rightarrow S_3$    | 305                             | 0.0184 | $\pi_{H-2} \rightarrow \pi_L^*$     | 49         |                                  |
| $S_0 \rightarrow S_4$    | 298                             | 0.1152 | $\pi_{H-3} \rightarrow \pi_L^*$     | 38         |                                  |
| $S_0 \rightarrow S_5$    | 276                             | 0.0130 | $\pi_H \rightarrow \pi_{L+1}^*$     | 47         |                                  |
| $S_0 \rightarrow S_6$    | 272                             | 0.1773 | $\pi_{H-1} \rightarrow \pi_{L+1}^*$ | 27         |                                  |
| $S_0 \rightarrow S_7$    | 260                             | 0.3688 | $\pi_H \rightarrow \pi_{L+3}^*$     | 42         |                                  |
| $S_0 \rightarrow S_8$    | 257                             | 0.4641 | $\pi_{H-1} \rightarrow \pi_{L+3}^*$ | 22         |                                  |
| $S_0 \rightarrow S_9$    | 244                             | 0.3431 | $\pi_{H-3} \rightarrow \pi_{L+1}^*$ | 16         |                                  |
| $S_0 \rightarrow S_{10}$ | 242                             | 0.0112 | $\pi_{H-3} \rightarrow \pi_L^*$     | 31         |                                  |
| $S_1 \rightarrow S_0$    | 471                             | 2.4905 | $\pi_H \rightarrow \pi_L^*$         | 85         | 505                              |

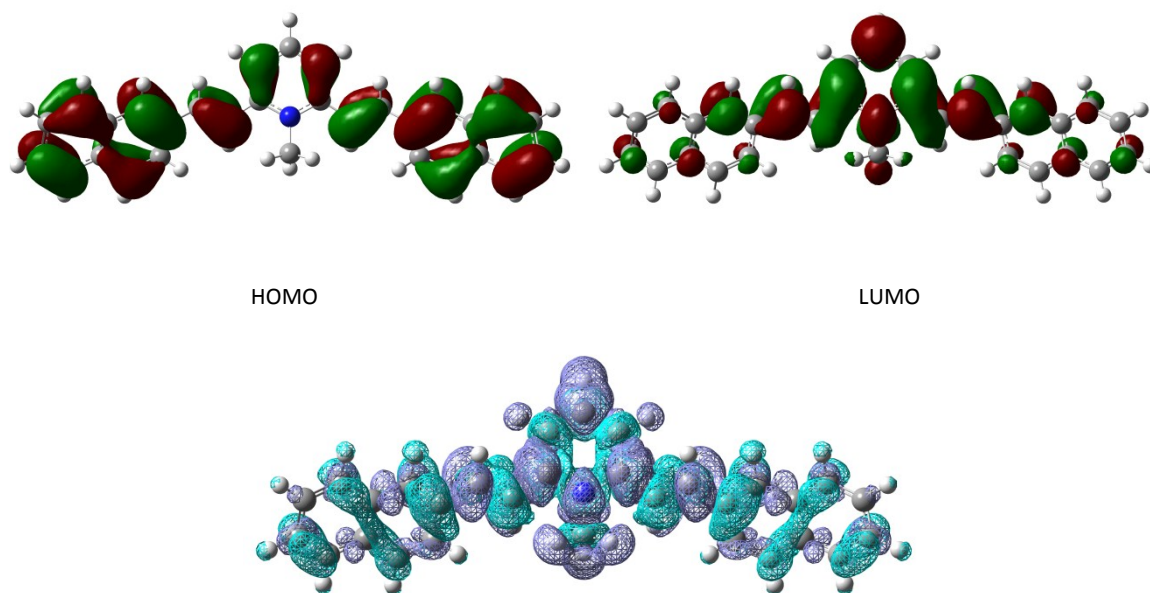

**Figure S9.** Isodensity plots of **N2** (rotamer CC) obtained by the CAM-B3LYP/6-31G(d) model (upper panel). Effect of the  $S_0 \rightarrow S_1$  transition on the electron density; increase and decrease of electron densities are represented by violet and cyan, respectively (lower panel).

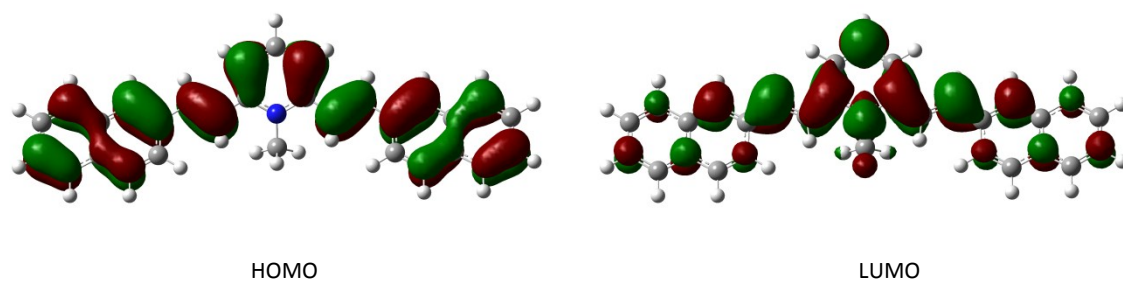



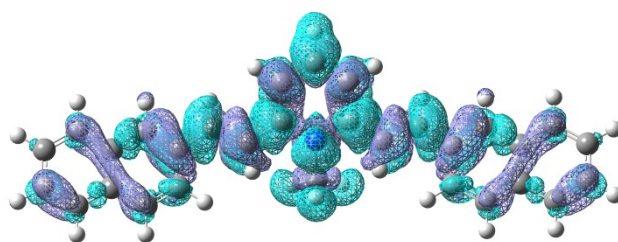

**Figure S10.** Isodensity plots of **N2** (rotamer CC) @ $S_{1,rel}$  obtained by the CAM-B3LYP/6-31G(d) model (upper panel). Effect of the  $S_1 \rightarrow S_0$  transition on the electron density @ $S_{1,rel}$ ; increase and decrease of electron densities are represented by violet and cyan, respectively (lower panel).

**Table S5.** Theoretical absorption and emission wavelengths of **N2** (rotamer CD), oscillator strengths, nature and composition in terms of molecular orbitals obtained by the CAM-B3LYP/6-31G(d) model in DCM (CPCM).

| Transition               | $\lambda_{th}/nm$ | f      | MO                                  | $c_i^2/\%$ |
|--------------------------|-------------------|--------|-------------------------------------|------------|
| $S_0 \rightarrow S_1$    | 382               | 1.9820 | $\pi_H \rightarrow \pi_L^*$         | 71         |
| $S_0 \rightarrow S_2$    | 336               | 0.2225 | $\pi_{H-1} \rightarrow \pi_L^*$     | 54         |
| $S_0 \rightarrow S_3$    | 307               | 0.1266 | $\pi_{H-2} \rightarrow \pi_L^*$     | 47         |
| $S_0 \rightarrow S_4$    | 299               | 0.1141 | $\pi_{H-3} \rightarrow \pi_L^*$     | 35         |
| $S_0 \rightarrow S_5$    | 277               | 0.0290 | $\pi_H \rightarrow \pi_{L+1}^*$     | 42         |
| $S_0 \rightarrow S_6$    | 275               | 0.1439 | $\pi_{H-1} \rightarrow \pi_{L+1}^*$ | 25         |
| $S_0 \rightarrow S_7$    | 260               | 0.1524 | $\pi_H \rightarrow \pi_{L+3}^*$     | 39         |
| $S_0 \rightarrow S_8$    | 256               | 0.5714 | $\pi_{H-1} \rightarrow \pi_{L+1}^*$ | 19         |
| $S_0 \rightarrow S_9$    | 245               | 0.3625 | $\pi_{H-3} \rightarrow \pi_{L+1}^*$ | 17         |
| $S_0 \rightarrow S_{10}$ | 242               | 0.0402 | $\pi_{H-3} \rightarrow \pi_L^*$     | 32         |
| $S_1 \rightarrow S_0$    | 481               | 1.9148 | $\pi_H \rightarrow \pi_L^*$         | 85         |

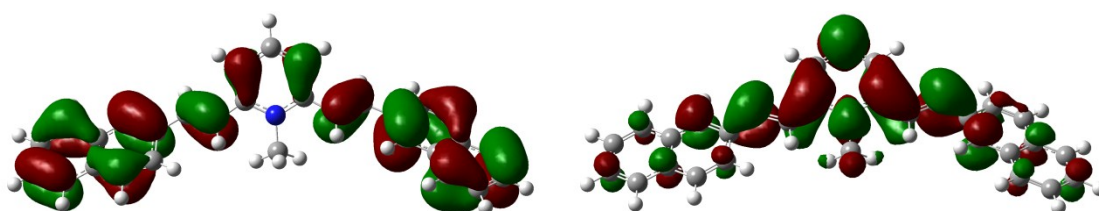

HOMO

LUMO

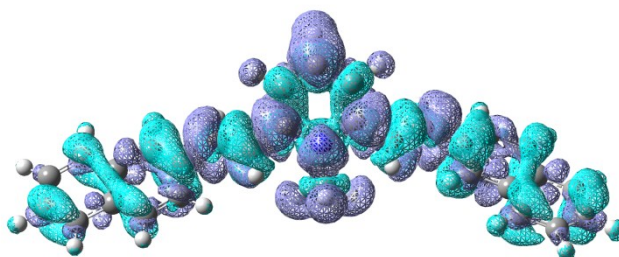

**Figure S11.** Isodensity plots of **N2** (rotamer CD) obtained by the CAM-B3LYP/6-31G(d) model (upper panel). Effect of the  $S_0 \rightarrow S_1$  transition on the electron density; increase and decrease of electron densities are represented by violet and cyano, respectively (lower panel).

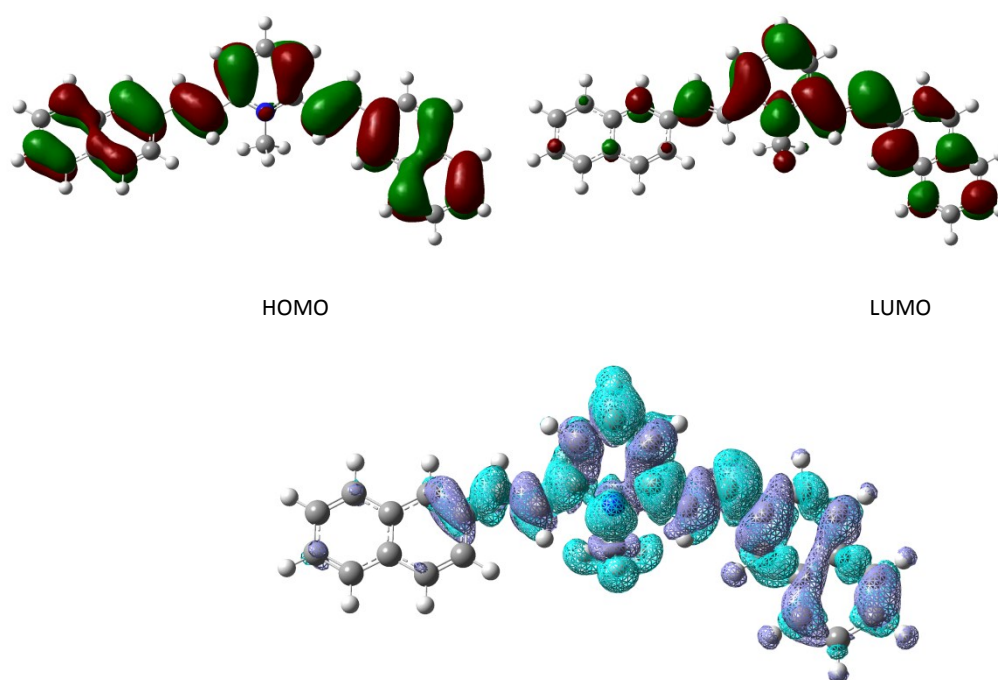

**Figure S12.** Isodensity plots of **N2** (rotamer CD) @ $S_{1,rel}$  obtained by the CAM-B3LYP/6-31G(d) model (upper panel). Effect of the  $S_1 \rightarrow S_0$  transition on the electron density @ $S_{1,rel}$ ; increase and decrease of electron densities are represented by violet and cyano, respectively (lower panel).

**Table S6.** Theoretical absorption and emission wavelengths of **N2** (rotamer DD), oscillator strengths, nature and composition in terms of molecular orbitals obtained by the CAM-B3LYP/6-31G(d) model in DCM (CPCM), together with the experimental emission maximum.

| Transition               | $\lambda_{th}/nm$ | f       | MO                                  | $c_i^2/\%$ | $\lambda_{exp}/nm$ |
|--------------------------|-------------------|---------|-------------------------------------|------------|--------------------|
| $S_0 \rightarrow S_1$    | 385               | 1.6678  | $\pi_H \rightarrow \pi_L^*$         | 71         | -                  |
| $S_0 \rightarrow S_2$    | 340               | 0.4234  | $\pi_{H-1} \rightarrow \pi_L^*$     | 55         |                    |
| $S_0 \rightarrow S_3$    | 310               | 0.2223  | $\pi_{H-2} \rightarrow \pi_L^*$     | 49         |                    |
| $S_0 \rightarrow S_4$    | 302               | 0.0942  | $\pi_{H-3} \rightarrow \pi_L^*$     | 35         |                    |
| $S_0 \rightarrow S_5$    | 279               | 0.0347  | $\pi_H \rightarrow \pi_{L+1}^*$     | 45         |                    |
| $S_0 \rightarrow S_6$    | 278               | 0.00172 | $\pi_{H-1} \rightarrow \pi_{L+1}^*$ | 26         |                    |
| $S_0 \rightarrow S_7$    | 261               | 0.0984  | $\pi_H \rightarrow \pi_{L+3}^*$     | 41         |                    |
| $S_0 \rightarrow S_8$    | 257               | 0.5674  | $\pi_{H-1} \rightarrow \pi_{L+1}^*$ | 22         |                    |
| $S_0 \rightarrow S_9$    | 246               | 0.4713  | $\pi_{H-3} \rightarrow \pi_{L+1}^*$ | 19         |                    |
| $S_0 \rightarrow S_{10}$ | 243               | 0.0079  | $\pi_{H-2} \rightarrow \pi_{L+1}^*$ | 18         |                    |
| $S_1 \rightarrow S_0$    | 478               | 1.8049  | $\pi_H \rightarrow \pi_L^*$         | 84         | 450 (EPA, 77 K)    |

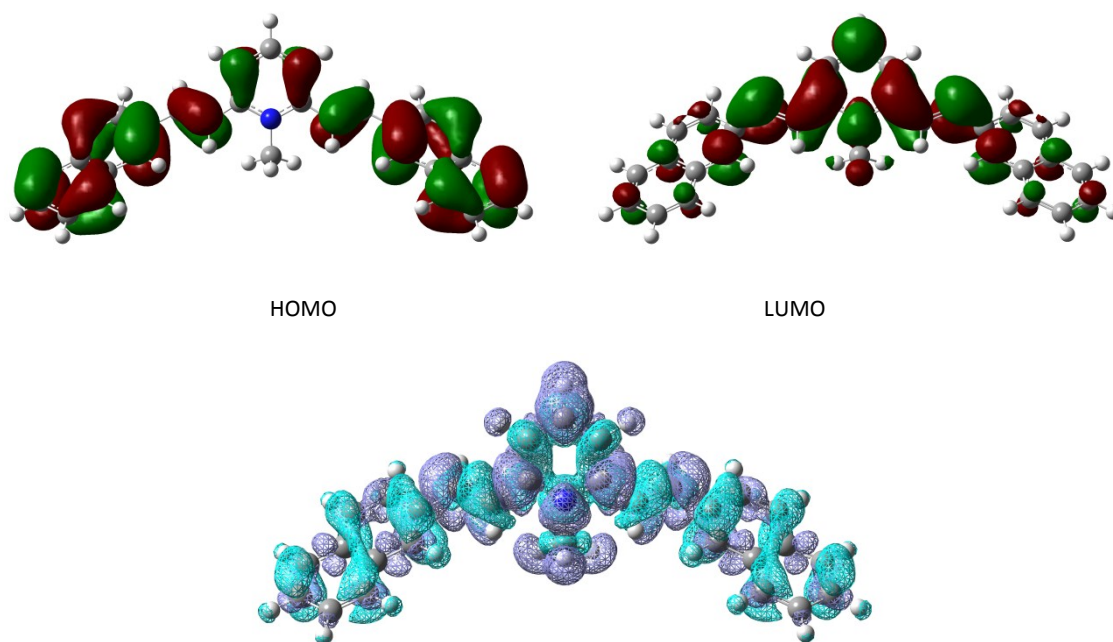

**Figure S13.** Isodensity plots of **N2** (rotamer DD) obtained by the CAM-B3LYP/6-31G(d) model (upper panel). Effect of the  $S_0 \rightarrow S_1$  transition on the electron density; increase and decrease of electron densities are represented by violet and cyano, respectively (lower panel).

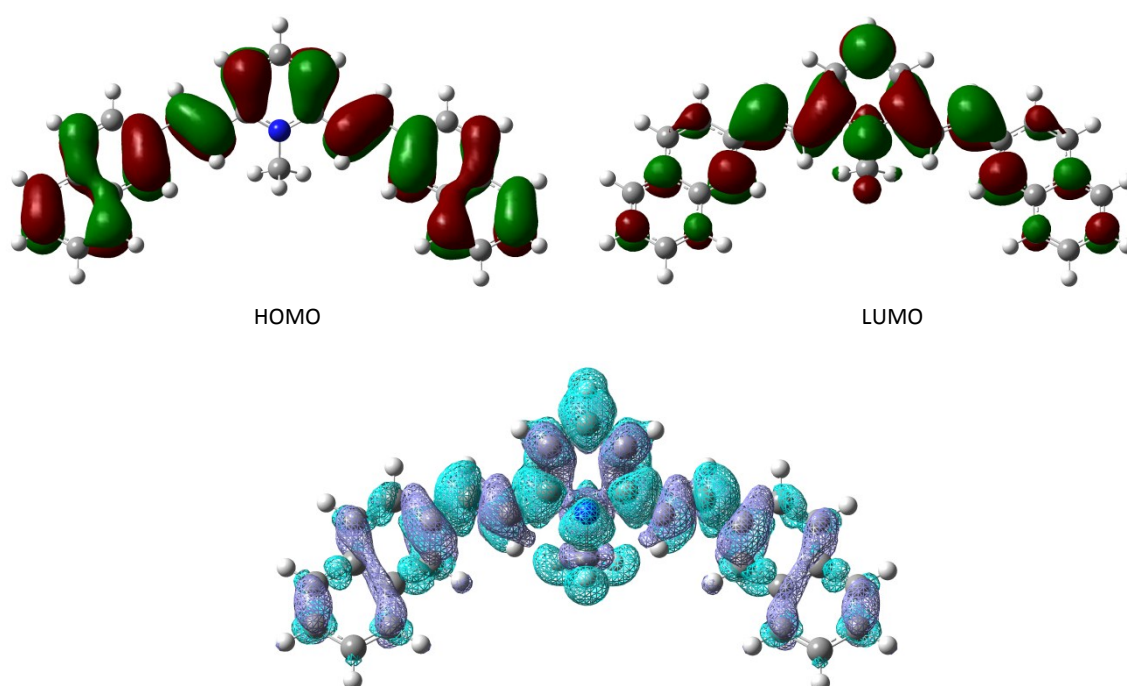

**Figure S14.** Isodensity plots of **N2** (rotamer DD) @ $S_{1,rel}$  obtained by the CAM-B3LYP/6-31G(d) model (upper panel). Effect of the  $S_1 \rightarrow S_0$  transition on the electron density @ $S_{1,rel}$ ; increase and decrease of electron densities are represented by violet and cyano, respectively (lower panel).

**Table S7.** Theoretical absorption and emission wavelengths of **N2** (rotamer CB), oscillator strengths, nature and composition in terms of molecular orbitals obtained by the CAM-B3LYP/6-31G(d) model in DCM (CPCM).

| Transition | $\lambda_{th}/nm$ | f | MO | $c_i^2/\%$ |
|------------|-------------------|---|----|------------|
|------------|-------------------|---|----|------------|



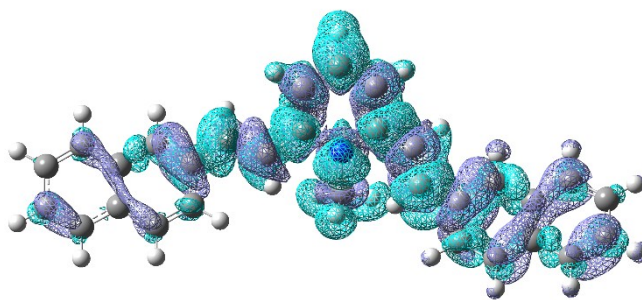

**Figure S16.** Isodensity plots of **N2** (rotamer CB) @ $S_{1,rel}$  obtained by the CAM-B3LYP/6-31G(d) model (upper panel). Effect of the  $S_1 \rightarrow S_0$  transition on the electron density @ $S_{1,rel}$ ; increase and decrease of electron densities are represented by violet and cyano, respectively (lower panel).

**P2.**

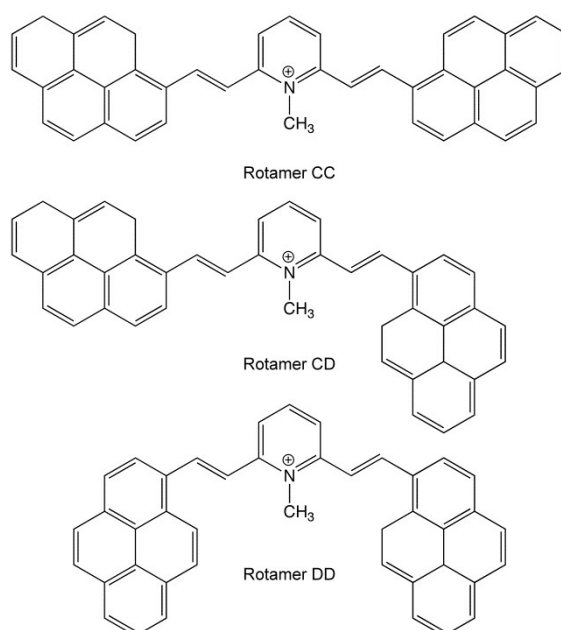

**Chart S3. P2** conformers generated by rotation about the quasi-single bonds between the double bonds and the side pyrene rings or the central methyl-pyridinium unit.

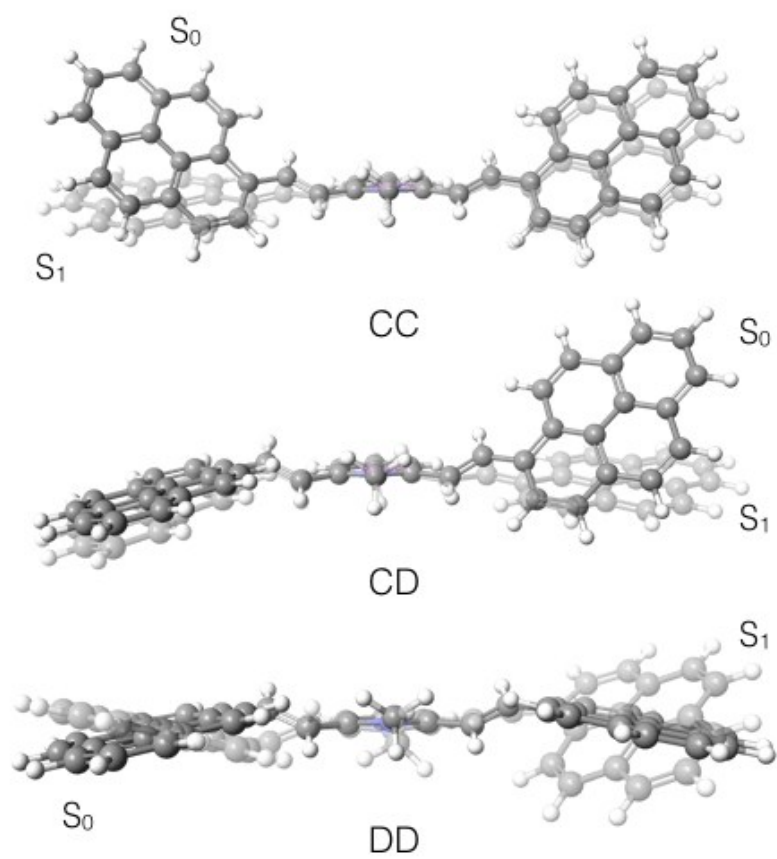

**Figure S17.** Molecular structures of ground and lowest excited singlet states (generally less planar and more planar, respectively) of **P2** rotamers obtained by the CAM-B3LYP/6-31G(d) model in DCM (CPCM).

**Table S8.** Dipole moments of **P2** rotamers together with the dihedral angles (Deg) obtained by the CAM-B3LYP/6-31G(d) model in DCM (CPCM).

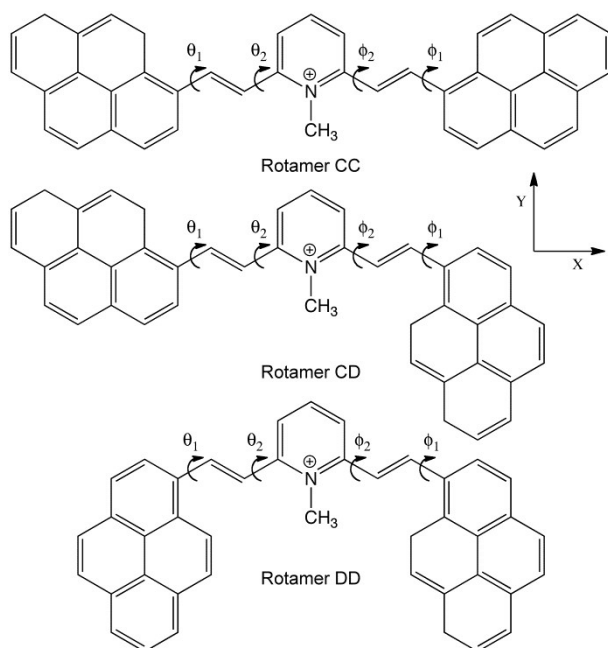

| rotamer | state           | $ \mu_x $ | $ \mu_y $ | $ \mu_z $ | $ \mu_T $ | $\theta_1$ | $\theta_2$ | $\phi_1$ | $\phi_2$ |
|---------|-----------------|-----------|-----------|-----------|-----------|------------|------------|----------|----------|
| CC      | $S_0$           | 0.00      | 3.84      | 2.35      | 4.50      | 26.4       | 34.1       | 26.4     | 34.1     |
|         | $S_{1,FC}$      | 0.01      | 1.07      | 0.88      | 1.39      |            |            |          |          |
|         | $S_{1,rel}$     | 10.9      | 0.61      | 0.43      | 10.9      | 1.3        | 9.7        | 21.4     | 32.6     |
|         | $S_0@S_{1,rel}$ | 4.6       | 1.20      | 1.14      | 4.88      |            |            |          |          |
| CD      | $S_0$           | 0.61      | 6.04      | 2.03      | 6.41      | 27.8       | 36.1       | 34.1     | 32.6     |
|         | $S_{1,FC}$      | 0.55      | 1.62      | 0.68      | 1.84      |            |            |          |          |
|         | $S_{1,rel}$     | 10.8      | 2.08      | 0.22      | 11.0      | 1.3        | 9.2        | 31.3     | 33.0     |
|         | $S_0@S_{1,rel}$ | 4.27      | 4.00      | 0.38      | 5.87      |            |            |          |          |
| DD      | $S_0$           | 0.00      | 8.60      | 0.26      | 8.60      | 33.6       | 33.9       | 33.9     | 33.6     |
|         | $S_{1,FC}$      | 0.00      | 2.33      | 0.22      | 2.34      |            |            |          |          |
|         | $S_{1,rel}$     | 9.75      | 2.65      | 0.60      | 10.1      | 20.1       | 4.8        | 33.7     | 34.1     |
|         | $S_0@S_{1,rel}$ | 4.54      | 6.63      | 0.65      | 8.06      |            |            |          |          |

**Table S9.** Theoretical absorption and emission wavelengths of **P2** (rotamer CC), oscillator strengths, nature and composition in terms of molecular orbitals obtained by the CAM-B3LYP/6-31G(d) model in DCM (CPCM), together with the experimental absorption and emission maxima.

| Transition               | $\lambda_{th}/nm$ | f      | MO                                  | $c_i^2/\%$ | $\lambda_{exp}/nm$ |
|--------------------------|-------------------|--------|-------------------------------------|------------|--------------------|
| $S_0 \rightarrow S_1$    | 439               | 2.3292 | $\pi_H \rightarrow \pi_L^*$         | 71         | 496                |
| $S_0 \rightarrow S_2$    | 399               | 0.3477 | $\pi_{H-1} \rightarrow \pi_L^*$     | 59         |                    |
| $S_0 \rightarrow S_3$    | 328               | 0.0030 | $\pi_{H-2} \rightarrow \pi_L^*$     | 32         |                    |
| $S_0 \rightarrow S_4$    | 324               | 0.0212 | $\pi_{H-3} \rightarrow \pi_L^*$     | 26         |                    |
| $S_0 \rightarrow S_5$    | 319               | 0.1311 | $\pi_{H-1} \rightarrow \pi_{L+1}^*$ | 25         |                    |
| $S_0 \rightarrow S_6$    | 316               | 0.1079 | $\pi_H \rightarrow \pi_{L+1}^*$     | 40         |                    |
| $S_0 \rightarrow S_7$    | 290               | 0.6569 | $\pi_H \rightarrow \pi_{L+3}^*$     | 38         |                    |
| $S_0 \rightarrow S_8$    | 286               | 0.2289 | $\pi_{H-1} \rightarrow \pi_{L+1}^*$ | 19         |                    |
| $S_0 \rightarrow S_9$    | 278               | 0.1047 | $\pi_{H-4} \rightarrow \pi_L^*$     | 27         |                    |
| $S_0 \rightarrow S_{10}$ | 269               | 0.1432 | $\pi_{H-3} \rightarrow \pi_L^*$     | 24         |                    |
| $S_1 \rightarrow S_0$    | 572               | 2.3814 | $\pi_H \rightarrow \pi_L^*$         | 81         | 615                |

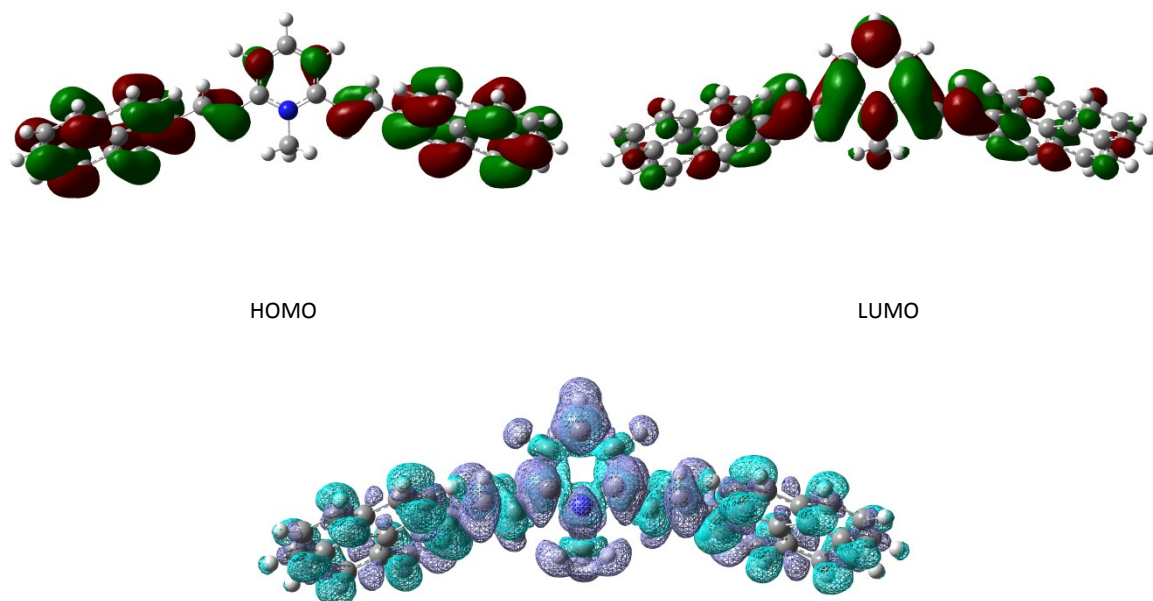

**Figure S18.** Isodensity plots of **P2** (rotamer CC) obtained by the CAM-B3LYP/6-31G(d) model (upper panel). Effect of the  $S_0 \rightarrow S_1$  transition on the electron density; increase and decrease of electron densities are represented by violet and cyan, respectively (lower panel).

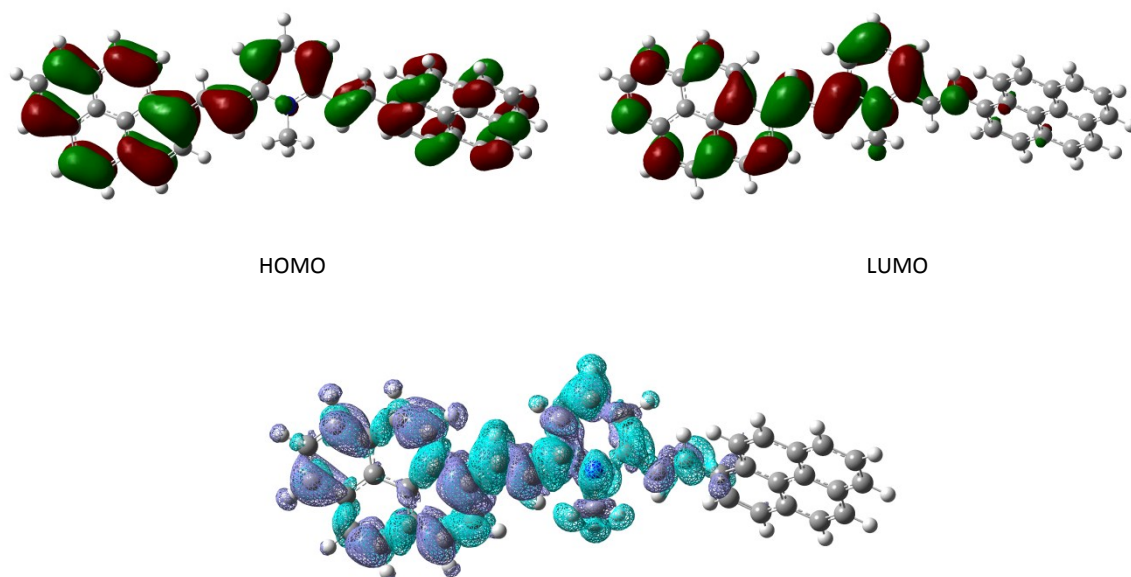

**Figure S19.** Isodensity plots of **P2** (rotamer CC) @ $S_{1,rel}$  obtained by the CAM-B3LYP/6-31G(d) model (upper panel). Effect of the  $S_1 \rightarrow S_0$  transition on the electron density; increase and decrease of electron densities are represented by violet and cyan, respectively (lower panel).



**Table S10.** Theoretical absorption and emission wavelengths of **P2** (rotamer CD), oscillator strengths, nature and composition in terms of molecular orbitals obtained by the CAM-B3LYP/6-31G(d) model in DCM (CPCM).

| Transition               | $\lambda_{th}/nm$ | f      | MO                                  | $c_i^2/\%$ |
|--------------------------|-------------------|--------|-------------------------------------|------------|
| $S_0 \rightarrow S_1$    | 431               | 1.9372 | $\pi_H \rightarrow \pi_L^*$         | 71         |
| $S_0 \rightarrow S_2$    | 395               | 0.4834 | $\pi_{H-1} \rightarrow \pi_L^*$     | 60         |
| $S_0 \rightarrow S_3$    | 326               | 0.1847 | $\pi_{H-2} \rightarrow \pi_L^*$     | 33         |
| $S_0 \rightarrow S_4$    | 323               | 0.0133 | $\pi_{H-3} \rightarrow \pi_L^*$     | 25         |
| $S_0 \rightarrow S_5$    | 318               | 0.2031 | $\pi_H \rightarrow \pi_{L+2}^*$     | 27         |
| $S_0 \rightarrow S_6$    | 313               | 0.1231 | $\pi_H \rightarrow \pi_{L+1}^*$     | 38         |
| $S_0 \rightarrow S_7$    | 289               | 0.0990 | $\pi_H \rightarrow \pi_{L+3}^*$     | 38         |
| $S_0 \rightarrow S_8$    | 285               | 0.5276 | $\pi_{H-1} \rightarrow \pi_{L+1}^*$ | 19         |
| $S_0 \rightarrow S_9$    | 278               | 0.1736 | $\pi_{H-1} \rightarrow \pi_{L+3}^*$ | 22         |
| $S_0 \rightarrow S_{10}$ | 269               | 0.0695 | $\pi_{H-3} \rightarrow \pi_L^*$     | 28         |
| $S_1 \rightarrow S_0$    | 572               | 2.1690 | $\pi_H \rightarrow \pi_L^*$         | 82         |

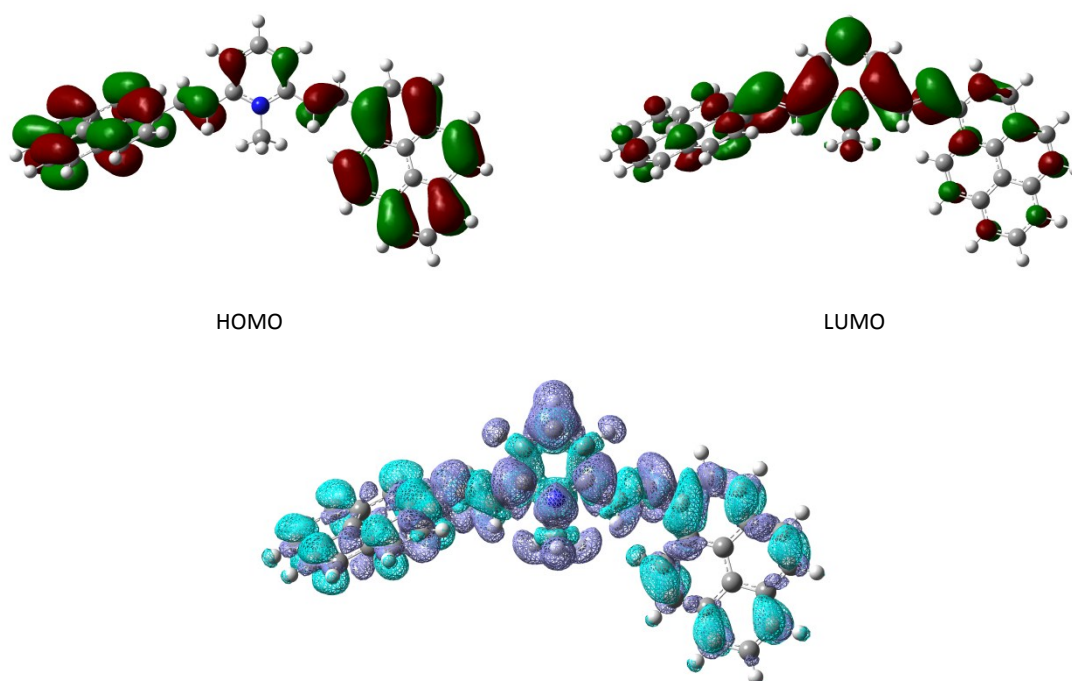

**Figure S20.** Isodensity plots of **P2** (rotamer CD) obtained by the CAM-B3LYP/6-31G(d) model (upper panel). Effect of the  $S_0 \rightarrow S_1$  transition on the electron density; increase and decrease of electron densities are represented by violet and cyan, respectively (lower panel).

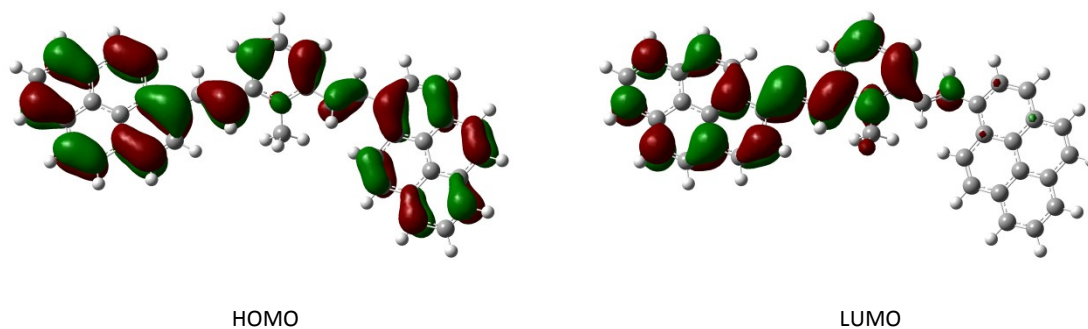

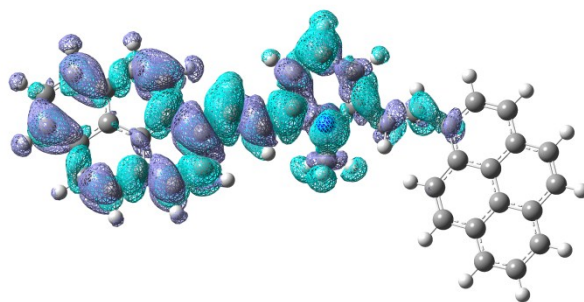

**Figure S21.** Isodensity plots of **P2** (rotamer CD) @ $S_{1,rel}$  obtained by the CAM-B3LYP/6-31G(d) model (upper panel). Effect of the  $S_1 \rightarrow S_0$  transition on the electron density; increase and decrease of electron densities are represented by violet and cyano, respectively (lower panel).

**Table S11.** Theoretical absorption and emission wavelengths of **P2** (rotamer DD), oscillator strengths, nature and composition in terms of molecular orbitals obtained by the CAM-B3LYP/6-31G(d) model in DCM (CPCM).

| Transition               | $\lambda_{th}/nm$ | f      | MO                                  | $c_i^2/\%$ |
|--------------------------|-------------------|--------|-------------------------------------|------------|
| $S_0 \rightarrow S_1$    | 429               | 1.3605 | $\pi_H \rightarrow \pi_L^*$         | 72         |
| $S_0 \rightarrow S_2$    | 393               | 0.9872 | $\pi_{H-1} \rightarrow \pi_L^*$     | 61         |
| $S_0 \rightarrow S_3$    | 325               | 0.1549 | $\pi_{H-2} \rightarrow \pi_L^*$     | 34         |
| $S_0 \rightarrow S_4$    | 322               | 0.0182 | $\pi_{H-3} \rightarrow \pi_L^*$     | 25         |
| $S_0 \rightarrow S_5$    | 317               | 0.0039 | $\pi_H \rightarrow \pi_{L+2}^*$     | 30         |
| $S_0 \rightarrow S_6$    | 313               | 0.2921 | $\pi_H \rightarrow \pi_{L+1}^*$     | 38         |
| $S_0 \rightarrow S_7$    | 288               | 0.1586 | $\pi_H \rightarrow \pi_{L+3}^*$     | 41         |
| $S_0 \rightarrow S_8$    | 285               | 0.6200 | $\pi_{H-4} \rightarrow \pi_L^*$     | 23         |
| $S_0 \rightarrow S_9$    | 279               | 0.0021 | $\pi_{H-1} \rightarrow \pi_{L+3}^*$ | 29         |
| $S_0 \rightarrow S_{10}$ | 270               | 0.0259 | $\pi_{H-3} \rightarrow \pi_L^*$     | 33         |
| $S_1 \rightarrow S_0$    | 580               | 1.5034 | $\pi_H \rightarrow \pi_L^*$         | 83         |

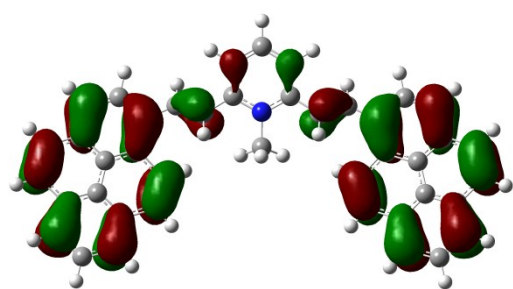

HOMO

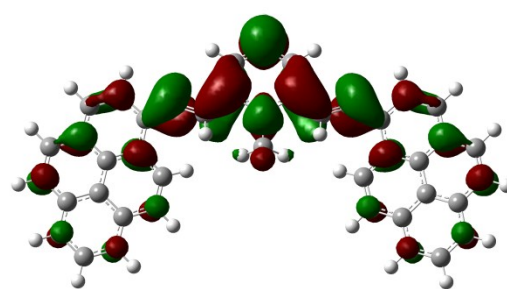

LUMO

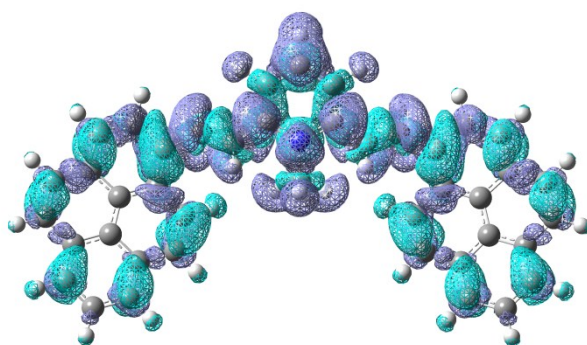

**Figure S22.** Isodensity plots of **P2** (rotamer DD) obtained by the CAM-B3LYP/6-31G(d) model (upper panel). Effect of the  $S_0 \rightarrow S_1$  transition on the electron density; increase and decrease of electron densities are represented by violet and cyano, respectively (lower panel).

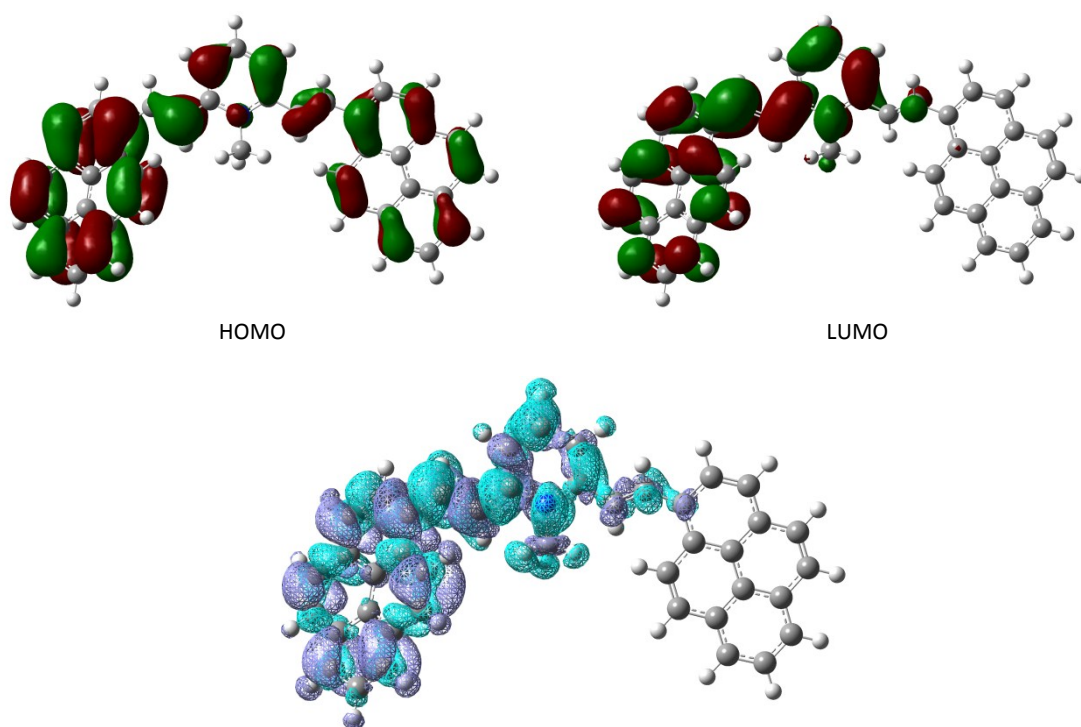

**Figure S23.** Isodensity plots of **P2** (rotamer DD) @ $S_{1,rel}$  obtained by the CAM-B3LYP/6-31G(d) model (upper panel). Effect of the  $S_1 \rightarrow S_0$  transition on the electron density; increase and decrease of electron densities are represented by violet and cyano, respectively (lower panel).

## Ultrafast measurements

**Table S12.** Spectral and kinetic properties of **N2** obtained from femtosecond excited state absorption measurements in solvents of different polarity and/or viscosity.

| Compound        | Solvent           | $\tau$ /ps                                          | $\lambda$ /nm                         | Assignment         |
|-----------------|-------------------|-----------------------------------------------------|---------------------------------------|--------------------|
| <b>N2</b>       | DCM               | 0.84                                                | 470(-), 535(+) <sup>sh</sup> , 710(+) | Solv./RI           |
|                 |                   | 16                                                  | 460(+), 550(-), 705(+)                | VC                 |
|                 |                   | 160                                                 | 465(+), 545(-), 705(+)                | S <sub>1,rel</sub> |
|                 | DCE               | 0.40                                                | <470(-), 530(+), 665(+) <sup>sh</sup> | Solv.              |
|                 |                   | 2.6                                                 | 495(-), 540(-), 680(+)                | Solv./RI           |
|                 |                   | 13                                                  | 540(-), 690(+)                        | VC                 |
|                 |                   | 210                                                 | 540(-), 685(+)                        | S <sub>1,rel</sub> |
|                 | 2-PrOH            | 0.83                                                | 485(-), 525(+) <sup>sh</sup> , 670(+) | Solv.              |
|                 |                   | 5.9                                                 | 495(-), 535(-) <sup>sh</sup> , 680(+) | Solv./RI           |
|                 |                   | 42                                                  | 535(-), 680(+)                        | Solv.              |
|                 |                   | 320                                                 | 540(-), 680(+)                        | S <sub>1,rel</sub> |
|                 | EtOH              | 0.45                                                | <480(-), 540(+), 720(+) <sup>sh</sup> | Solv.              |
|                 |                   | 2.9                                                 | 485(-), 720(+) <sup>sh</sup>          | Solv./RI           |
|                 |                   | 29                                                  | 535(-), 720(+) <sup>sh</sup>          | Solv.              |
|                 |                   | 310                                                 | 450(+), 540(-), 720(+) <sup>sh</sup>  | S <sub>1,rel</sub> |
|                 | MeOH              | 0.13                                                | <465(-), 540(+), 675(+) <sup>sh</sup> | Solv.              |
|                 |                   | 1.7                                                 | 485(-), 705(+) <sup>sh</sup>          | Solv./RI           |
|                 |                   | 11                                                  | 535(-), 720(+)                        | Solv.              |
|                 |                   | 290                                                 | 540(-), 700(+)                        | S <sub>1,rel</sub> |
|                 | MeCN              | 0.10                                                | <475(-), 540(+)                       | Solv.              |
|                 |                   | 0.67                                                | 485(-), 575(+)                        | Solv./RI           |
|                 |                   | 24                                                  | 455(+), 545(-), 710(+)                | VC                 |
|                 |                   | 370                                                 | 455(+), 540(-), 710(+)                | S <sub>1,rel</sub> |
|                 | MeOH/Gly<br>50:50 | 0.20                                                | 535(+), 685(+) <sup>sh</sup>          | Solv.              |
| 3.4             |                   | <490(-), 540(+) <sup>sh</sup> , 665(+)              | Solv.                                 |                    |
| 31              |                   | 495(-), 535(-) <sup>sh</sup> , 670(+)               | Solv./RI                              |                    |
| 380             |                   | 535(-), 675(+)                                      | S <sub>1,rel</sub>                    |                    |
| EtGly           | 0.20              | 545(+), 660(+) <sup>sh</sup>                        | Solv.                                 |                    |
|                 | 2.5               | <490(-), 540(+) <sup>sh</sup> , 665(+)              | Solv.                                 |                    |
|                 | 30                | 500(-), 535(-) <sup>sh</sup> , 670(+)               | Solv./RI                              |                    |
|                 | 520               | 540(-), 680(+)                                      | S <sub>1,rel</sub>                    |                    |
| W/EtOH<br>70:30 | 0.10              | 530(+)                                              | Solv.                                 |                    |
|                 | 1.0               | 485(-), 595(+) <sup>sh</sup> , 720(+) <sup>sh</sup> | Solv./RI                              |                    |
|                 | 6.9               | 450(+), 525(-), 715(+)                              | Solv.                                 |                    |
|                 | 270               | 455(+), 545(-), 700(+)                              | S <sub>1,rel</sub>                    |                    |

**Solv.** = solvation; **VC** = vibrational cooling; **RI** = rotamer interconversion.

**Table S13.** Spectral and kinetic properties of **P1** obtained from femtosecond excited state absorption measurements in solvents of different polarity and/or viscosity.

| Compound   | Solvent | $\tau$ /ps     | $\lambda$ /nm             | Assignment                |
|------------|---------|----------------|---------------------------|---------------------------|
| <b>P1*</b> | DCM     | 1.3            | 540(-), 620(+)            | Solv./S <sub>1</sub> (LE) |
|            |         | 34             | 560(+), 720(-)            | S <sub>1</sub> (TICT)     |
|            |         | 420            | 545(+), 630(-)            | S <sub>1</sub> (PICT)     |
|            | DCE     | 0.1            | broad                     | Solv.                     |
|            |         | 18             | 550(+)                    | S <sub>1</sub> (TICT)     |
|            |         | 160            | 540(+), 615(-)            | S <sub>1</sub> (PICT)     |
|            | 2-PrOH  | <0.1           | 650(+)                    | Solv.                     |
|            |         | 10             | 600(+)                    | Solv./S <sub>1</sub> (LE) |
|            |         | 40             | 550(+), 635(-)            | S <sub>1</sub> (TICT)     |
|            |         | 390            | 540(+), 620(-)            | S <sub>1</sub> (PICT)     |
|            | EtOH    | 0.83           | 500(-), 640(+)            | Solv.                     |
|            |         | 5.2            | 535(-), 610(+)            | Solv./S <sub>1</sub> (LE) |
|            |         | 30             | 580(+)                    | S <sub>1</sub> (TICT)     |
|            |         | 285            | 540(+), 630(-)            | S <sub>1</sub> (PICT)     |
|            | MeOH    | 0.37           | 550(-), 640(+)            | Solv.                     |
|            |         | 2.8            | 535(-), 610(+)            | Solv./S <sub>1</sub> (LE) |
|            |         | 29             | 555(+)                    | S <sub>1</sub> (TICT)     |
|            |         | 295            | 535(+), 625(-)            | S <sub>1</sub> (PICT)     |
| MeCN       | 0.15    | 535(-), 640(+) | Solv.                     |                           |
|            | 0.84    | 530(-), 605(+) | Solv./S <sub>1</sub> (LE) |                           |
|            | 32      | 545(+), 645(-) | S <sub>1</sub> (TICT)     |                           |
|            | 310     | 535(+), 625(-) | S <sub>1</sub> (PICT)     |                           |

\* From ref. 29.

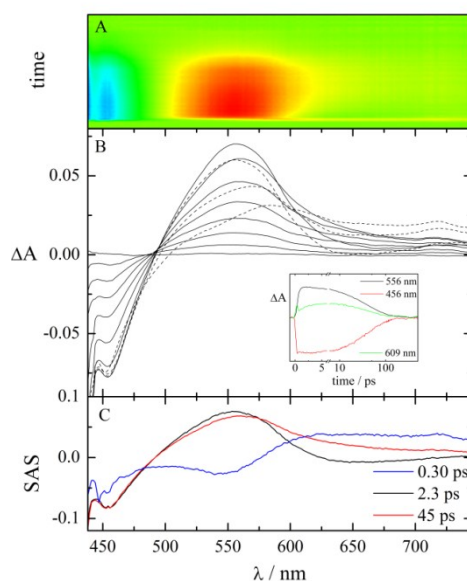

**Figure S24.** Pump-probe absorption spectroscopy of **P2** in MeCN ( $\lambda_{\text{exc}} = 400$  nm): (A) contour plot of the experimental data, (B) time-resolved absorption spectra recorded at increasing delays after the laser pulse (inset: decay kinetics at meaningful wavelengths, with a linear scale for the first picoseconds and a *log* scale for longer times), and (C) Species Associated Spectra (SAS) calculated by Target Analysis.

**Table S14.** Spectral and kinetic properties of **P2** obtained from femtosecond excited state absorption measurements in solvents of different polarity and/or viscosity.

| Compound            | Solvent | $\tau$ /ps                             | $\lambda$ /nm                                  | Assignment                |
|---------------------|---------|----------------------------------------|------------------------------------------------|---------------------------|
| <b>P2</b>           | DCM     | 0.71                                   | 470(-), 605(+) <sup>sh</sup> , 725(+)          | Solv./S <sub>1</sub> (LE) |
|                     |         | 430                                    | 465(-), 570(+), 660(-)                         | S <sub>1</sub> (ICT)      |
|                     |         | rest                                   | 575(+)                                         | T <sub>1</sub>            |
|                     | DCE     | 1.4                                    | 470(-), 605(+), 690(+) <sup>sh</sup>           | Solv./S <sub>1</sub> (LE) |
|                     |         | 300                                    | <505(-), 565(+), 660(-)                        | S <sub>1</sub> (ICT)      |
|                     |         | rest                                   | 570(+)                                         | T <sub>1</sub>            |
|                     | 2-PrOH  | 1.9                                    | <545(-), 610(+)                                | Solv.                     |
|                     |         | 12                                     | <500(-), 535(+) <sup>sh</sup> , 580(+), 700(+) | Solv./S <sub>1</sub> (LE) |
|                     |         | 400                                    | <500(-), 555(+), 650(-)                        | S <sub>1</sub> (ICT)      |
|                     |         | rest                                   | 620(+)                                         | T <sub>1</sub>            |
| EtOH                | 2.0     | 455(-), 540(-) <sup>sh</sup> , 595(+)  | Solv./S <sub>1</sub> (LE)                      |                           |
|                     | 21      | 450(-), 555(+), 640(-)                 | Solv.                                          |                           |
|                     | 190     | 450(-), 560(+), 665(-)                 | S <sub>1</sub> (ICT)                           |                           |
|                     | rest    | broad                                  | T <sub>1</sub>                                 |                           |
| MeOH/Gly<br>(70:30) | 0.51    | <535(-), 625(+)                        | Solv.                                          |                           |
|                     | 7.0     | 525(+) <sup>sh</sup> , 590(+)          | Solv./S <sub>1</sub> (LE)                      |                           |
|                     | 165     | 555(+), 655(-)                         | S <sub>1</sub> (ICT)                           |                           |
| MeOH                | 0.67    | 520(-), 610(+)                         | Solv./S <sub>1</sub> (LE)                      |                           |
|                     | 3.9     | 450(-), 555(+), 640(-)                 | Solv.                                          |                           |
|                     | 73      | 450(-), 560(+)                         | S <sub>1</sub> (ICT)                           |                           |
|                     | rest    | broad                                  | T <sub>1</sub>                                 |                           |
| Ac                  | 0.52    | 545(-), 625(+)                         | Solv./S <sub>1</sub> (LE)                      |                           |
|                     | 3.2     | <490(-), 550(+), 650(-)                | Solv./VC                                       |                           |
|                     | 64      | <490(-), 560(+)                        | S <sub>1</sub> (ICT)                           |                           |
|                     | rest    | broad                                  | T <sub>1</sub>                                 |                           |
| MeCN                | 0.30    | 450(-), 545(-), 625(+)                 | Solv./S <sub>1</sub> (LE)                      |                           |
|                     | 2.3     | 455(-), 555(+), 655(-)                 | Solv./VC                                       |                           |
|                     | 45      | 455(-), 560(+)                         | S <sub>1</sub> (ICT)                           |                           |
| EtGly               | 0.61    | <525(-), 650(+)                        | Solv.                                          |                           |
|                     | 2.9     | <500(-), 630(+)                        | Solv.                                          |                           |
|                     | 20      | <485(-), 530(+) <sup>sh</sup> , 585(+) | Solv./S <sub>1</sub> (LE)                      |                           |
|                     | 170     | <485(-), 550(+), 700(-)                | S <sub>1</sub> (ICT)                           |                           |
|                     | rest    | 620(+)                                 | T <sub>1</sub>                                 |                           |

### Temperature and viscosity effect on absorption and emission

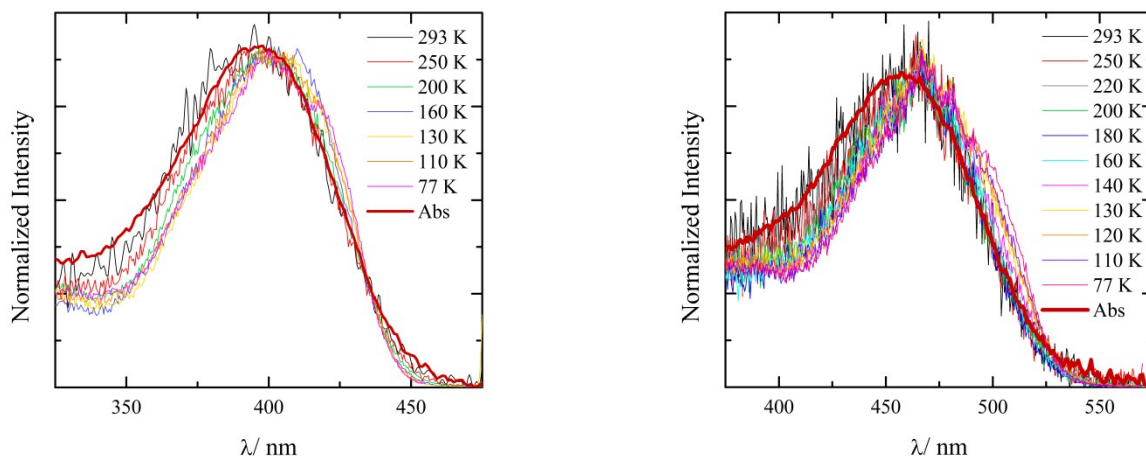

**Figure S25.** Temperature effect on the excitation spectra of **N2**, left graph, and **P2**, right graph, in EPA. The absorption spectrum recorded at room temperature is reported in red solid line for comparison purposes.

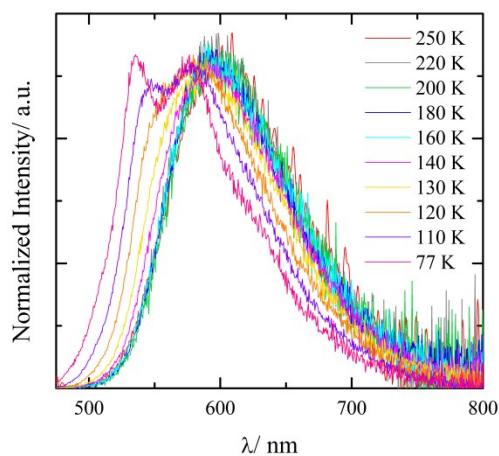

**Figure S26.** Area normalized emission spectra ( $\lambda_{exc} = 465$  nm) of **P2** in EPA as a function of temperature.

**Table S15.** Fluorescence quantum yields ( $\phi_F$ ) of **N2** in EPA at different temperatures ( $\lambda_{exc} = 397$  nm).

| T /K | $\phi_F$ |
|------|----------|
| 293  | 0.032    |
| 250  | 0.15     |
| 200  | 0.38     |
| 160  | 0.47     |
| 130  | 0.43     |
| 110  | 0.39     |
| 77   | 0.45     |

**Table S16.** Fluorescence quantum yields ( $\phi_F$ ) of **P2** in EPA at different temperatures ( $\lambda_{exc} = 465$  nm).

| T /K | $\phi_F$ |
|------|----------|
| 293  | 0.037    |
| 250  | 0.081    |
| 220  | 0.11     |
| 200  | 0.20     |
| 180  | 0.26     |
| 160  | 0.34     |
| 140  | 0.45     |
| 130  | 0.55     |
| 120  | 0.69     |
| 110  | 0.85     |
| 77   | 0.94     |

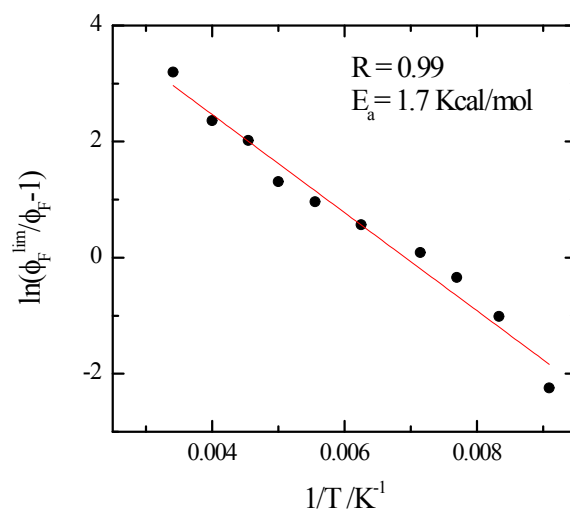

**Figure S27.** Plot of the fluorescence quantum yields according to the Arrhenius-type equation.
